1 **Title: Ecological theory predicts ecosystem stressor interactions in freshwater**  
2 **ecosystems, but highlights the strengths and weaknesses of the additive null**  
3 **model**

4  
5 **Benjamin J. Burgess<sup>1\*</sup>,**

6 **Drew Purves<sup>1,2</sup>,**

7 **Georgina Mace<sup>1</sup>,**

8 **David J. Murrell<sup>1</sup>**

9  
10 <sup>1</sup> **Centre for Biodiversity and Environment Research, Department of Genetics, Evolution and**  
11 **Environment, University College London, Gower Street, London, WC1E 6BT, United Kingdom**

12 <sup>2</sup> **DeepMind, 6 Pancras Square, London, N1C 4AG, United Kingdom**

13 **\*corresponding author ([benjamin.burgess.17@ucl.ac.uk](mailto:benjamin.burgess.17@ucl.ac.uk))**

14 **Running Title: Theory predicts stressor interactions**

15 **Word Count: 7060**

16

17

18 **Abstract**

19 Understanding and predicting how multiple co-occurring environmental stressors combine to affect  
20 biodiversity and ecosystem services is an on-going grand challenge for ecology. So far progress has  
21 been made through accumulating large numbers of smaller-scale individual studies that are then  
22 investigated by meta-analyses to look for general patterns. In particular there has been an interest in  
23 checking for so-called ecological surprises where stressors interact in a synergistic manner. Recent  
24 reviews suggest that such synergisms do not dominate, but few other generalities have emerged. This  
25 lack of general prediction and understanding may be due in part to a dearth of ecological theory that  
26 can generate clear hypotheses and predictions to tested against empirical data. Here we close this gap  
27 by analysing food web models based upon classical ecological theory and comparing their predictions  
28 to a large (546 interactions) dataset for the effects of pairs of stressors on freshwater communities,  
29 using trophic- and population-level metrics of abundance, density, and biomass as responses. We find  
30 excellent overall agreement between the stochastic version of our models and the experimental data,  
31 and both conclude additive stressor interactions are the most frequent, but that meta-analyses report  
32 antagonistic summary interaction classes. Additionally, we show that the statistical tests used to  
33 classify the interactions are very sensitive to sampling variation. It is therefore likely that current weak  
34 sampling and low sample sizes are masking many non-additive stressor interactions, which our theory  
35 predicts to dominate when sampling variation is removed. This leads us to suspect ecological surprises  
36 may be more common than currently reported. Our results highlight the value of developing theory  
37 in tandem with empirical tests, and the need to examine the robustness of statistical machinery,  
38 especially the widely-used null models, before we can draw strong conclusions about how  
39 environmental drivers combine.

40

41 **Keywords**

42 Meta-analysis; Lotka-Volterra; Ecological Surprise; Multiple Stressors; Environmental Drivers; Food

43 Chain; Theoretical Ecology; Sampling Variation; Freshwater; Multiple Factors; Synergy.

44

45

46

47

48

49

50

51

## 52 **Introduction**

53 Ecosystems are being subjected to a wide variety of external stressors (Halpern et al. 2015), acting  
54 across terrestrial, freshwater, and marine biomes (Scheffers et al. 2016). Stressors, also termed  
55 drivers, factors, or perturbations (Orr et al. 2020), are frequently anthropogenic in origin (Vörösmarty  
56 et al. 2010; Geldmann et al. 2014), but are capable of being abiotic or biotic (Przeslawski et al. 2015),  
57 and are able to act at any scale, from local to global (Ban et al. 2014; França et al. 2020). While  
58 individual stressors, (e.g. climate change, habitat alteration, or pollution), are themselves capable of  
59 inducing changes in biodiversity or ecosystems and their services (Dirzo et al. 2014; Tittensor et al.  
60 2014; Newbold et al. 2015), ecosystems are frequently, if not predominately, acted upon by multiple  
61 stressors simultaneously (Crain et al. 2008). Despite the negative connotations surrounding the term  
62 *stressor*, stressors are capable of inducing effects that are either beneficial or detrimental to the  
63 affected ecosystem (Kroeker et al. 2017). Accordingly, one of the grand challenges facing ecologists is  
64 to be able to predict and understand how these different types of ecosystem stressors interact to  
65 affect biodiversity and ecosystem services (Hodgson & Halpern 2018); though these interactions can  
66 be challenging to predict as the observed interactions can substantially deviate from what is  
67 anticipated (Christensen et al. 2006). Ultimately, knowledge of how stressors interact is important in  
68 guiding conservation and management initiatives, and in helping to prevent remediation measures  
69 from being ineffective, or even potentially harming those systems they are intended to preserve  
70 (Brown et al. 2013; Côté et al. 2016).

71

72 Aquatic ecosystems and communities are particularly threatened by multiple stressors (Dirk et al.  
73 2020); for instance, Halpern et al., (2008) describe how every marine area is subjected to human  
74 influence, with 41% of these areas being impacted by multiple stressors. Moreover, freshwaters  
75 represent some of the most at-risk ecosystems and are frequently exposed to a wide range of stressors  
76 (Hecky et al., 2010; Ormerod et al. 2010; Woodward et al., 2010; He et al., 2019), with freshwater

77 biodiversity declining at rates exceeding even those of the most impacted terrestrial ecosystems (Sala  
78 et al., 2000), and potentially endangering vital ecosystem services (Malaj et al. 2014). While stressors  
79 often interact to impact freshwater ecosystems (Dirk et al. 2020), their presence in freshwater systems  
80 is not a new phenomenon, with some freshwater bodies having been subjected to stressors for several  
81 centuries (Dudgeon et al., 2006). However, the stressors that freshwater systems are currently facing  
82 has expanded, with the introduction of novel stressors, such as nanomaterials, while existing stressors  
83 are continuing to have severe impacts (Reid et al., 2019). Similarly, the cumulative impact of multiple  
84 stressors has been identified as one of the most pressing and emerging threats to freshwater  
85 biodiversity, but despite this, our current understanding of both how stressors interact, and the  
86 severity of their effects, is poor (Reid et al., 2019).

87

88 The term *ecological surprise* (*sensu* Paine et al. 1998) is often used to describe the changes in a variable  
89 that contrast those anticipated when multiple stressors interact (e.g. Christensen et al. 2006; Jackson  
90 et al. 2016). Most often, the term is applied to the interactions of stressors which interact  
91 synergistically; in other words, the observed change in a variable is greater than expected under the  
92 assumption the interaction is equal to the sum of the independent stressor effects. Accordingly, the  
93 synergistic interactions of multiple stressors are important to document, firstly due to their potential  
94 to have a dramatic effect on ecological communities, and secondly because the presence of a  
95 synergistic interaction means management strategies can potentially have a large effect by mitigating  
96 against just one of the interacting stressors (Brown et al. 2013; Côté et al. 2016; Haller-Bull & Bode  
97 2019). Because of their potential impact there has been a great deal of effort in documenting the  
98 frequency of synergy in stressors across different ecosystems and communities (Côté et al. 2016).  
99 However, there is always a danger that an emphasis on their importance could lead to overestimating  
100 the frequency of ecological surprises within the multiple stressor literature and, as highlighted by Côté  
101 et al. (2016), the evidence that most stressors interact in a synergistic manner is far from compelling.

102 A pertinent question which has yet to be fully answered is whether synergistic interactions, or other  
103 forms of ecological surprise, really should be expected, or whether the prevalence of these  
104 interactions are skewed in some way by reporting biases, statistical sampling, or both.

105 However, there is relatively little ecological theory that predicts when and how often the cumulative  
106 effects of pairs of stressors should be synergistic, or indeed any other type of interaction. This is in  
107 contrast to other ecological interactions, such as the effects of multiple predators on prey density and  
108 biomass, where a much richer body of theory that has been able to generate a number of hypotheses  
109 for testing (Sih et al. 1998; Schmitz 2007). Instead, progress on ecosystem stressor interactions has  
110 been made largely by meta-analyses across a number of experiments, realms, trophic levels,  
111 measured traits, taxonomic groups, and stressor types (e.g. Crain et al. 2008; Darling and Côté 2008;  
112 Wu et al. 2011; Przeslawski et al. 2015; Jackson et al. 2016). Within ecological research, the most  
113 popular approach is to use the additive null model where the stressor interaction is predicted to be  
114 simply the sum of their individual effects (e.g. Crain et al. 2008; Darling & Côté 2008; Strain et al. 2014;  
115 Jackson et al. 2016), though the multiplicative null model is also relatively common (e.g. Bancroft et  
116 al. 2008; Gruner et al. 2008; Harvey et al. 2013; Rosenblatt & Schmitz 2014). Predominately, these null  
117 models classify interactions as either being null (the simplest additive or multiplicative effect of  
118 interacting stressors), synergisms, or antagonisms (i.e. the effect of the interacting stressors is less  
119 than expected). While distinctions are increasingly being made for various forms of antagonistic  
120 interactions (e.g. Jackson et al. 2016), there exists a range of other classification schemes (Orr et al.  
121 2020), implemented across a number of studies (e.g. Travers-Trolet et al. 2014; Piggott et al. 2015a).  
122 This can make it difficult to generalise results across different studies, because a 'synergistic' or  
123 'antagonistic' interaction may have contrasting definitions depending on the scheme being used.  
124 Despite meta-analyses being a powerful tool for investigating multiple stressors, they have to date  
125 highlighted no general covariates capable of explaining of the broad patterns of multiple stressor  
126 interactions, which in turn lead to more general predictions of the consequences of multiple stressors  
127 (Côté et al. 2016).

128 Given the lack of consistent generalities from empirical studies, there have been calls for the  
129 development of theory within multiple stressor research. Of primary interest is the generation of  
130 theory which can provide a mechanistic underpinning to the field, and hopefully allow for better  
131 prediction and an increased understanding of multiple stressor interactions, compared to that which  
132 is provided solely by a null model approach (De Laender 2018). For example, using only statistical null  
133 models it is hard to predict, and therefore understand, how an interaction between stressors will  
134 change as one or more stressors changes in intensity. Some theory has been developed for particular  
135 case studies (e.g. Brown et al. 2013; Galic et al. 2018), but only a few studies have so far looked for  
136 more general insights. For example, Haller-Bull and Bode (2019) used three population dynamic  
137 models to investigate how stressors reducing population growth or suppressing carry capacity combine  
138 to affect equilibrium population biomass under harvesting. Across all models they found synergy only  
139 occurs if there are several impacts on growth rate, and more generally the interaction behaviour can  
140 be predicted by the relationship between the impacted parameter and the equilibrium population  
141 size; a convex relationship implies antagonism, and a concave relationship implying synergy.

142 Although population models are easier to analyse, incorporating trophic interactions would seem a  
143 necessary feature for a general dynamical theory for multiple ecosystem stressors since they may act  
144 either directly (e.g. on mortality rate of a given species) or indirectly (e.g. on mortality rate of the prey  
145 of a given species). Indeed, De Laender (2018) has recently argued for the use of resource uptake  
146 theory to make predictions about stressor interactions, and, as an example, showed that in a two-  
147 species community, the manner in which stressors interact is dependent on the details of which  
148 species (one, or both) are being directly affected by the stressors. Extending to more diverse ecological  
149 communities, Thompson et al. (2018a) used modified (log-linear) Lotka-Volterra models to investigate  
150 how the effect of multiple stressors on species richness changes with the type of biological interaction  
151 that dominates a community. They found negative biological interactions, (predation, competition),  
152 were more likely to lead to synergistic changes in species richness, whilst stressor interactions were  
153 predominantly additive or slightly antagonistic when biological interactions were positive. These

154 models all show much promise for theory to generate predictions, but as yet none have been tested  
155 against data. To compare to data, models need to incorporate stochasticity to mirror the sampling  
156 variation found in the real world. In natural experiments sampling variation occurs in the estimation  
157 of the state variables of interest such population density or biomass (e.g. Graham & Vinebrooke 2009;  
158 Piggott et al. 2015b), or individual growth rates (e.g. Reisinger & Lodge 2016), and this error enters  
159 the estimation of the interaction of the co-occurring stressors with the inevitable result that some  
160 interactions are misclassified due to sampling variation. The simplest way to incorporate sampling  
161 variation in models is via some form of observation error, but De Laender (2018), Haller-Bull and Bode  
162 (2019), and Thompson et al. (2018a) all base their predictions on deterministic models, with  
163 stochasticity only entering the latter in the form of parameter combinations.

164 Here we build on this theory by developing classical community ecology models based upon Lotka-  
165 Volterra consumer-resource dynamics, but including observation error, to generate predictions from  
166 biologically simple food webs. These predictions are tested against an extensive dataset for the effects  
167 of co-occurring stressor interactions on the biomasses and densities of freshwater organisms, taken  
168 from a review of the experimental literature. Using this twin approach, we answer the following  
169 questions: Can dynamical food web theory predict (1) the frequencies of stressor interaction types  
170 across the individual experimental studies, and/or (2) the expected summary effect sizes and summary  
171 interaction type in a meta-analytical framework? In particular we ask if the apparent absence of  
172 ecological surprises in the empirical literature is expected from ecological theory, and in so doing we  
173 also test the robustness of the currently popular additive null model for classifying stressor  
174 interactions to sampling variation. As will be shown below, our results uncover a high level of  
175 agreement between theory and data but also highlight some of the strengths and weaknesses of the  
176 additive null model.

177

## 178 **Materials and Methods**



179 *Theoretical Models*

180 In order to provide a theoretical underpinning for the empirical results, we build food chain models  
181 using the classical Lotka-Volterra consumer resource equations. To increase the robustness of our  
182 conclusions we consider two forms of model; one where (within trophic level) density dependence  
183 affects the death rates of each trophic level, and a second where consumer uptake is density regulated  
184 (Table 1). Both these scenarios were analysed by Heath et al., (2014) to investigate the roles of  
185 different types of density dependence on trophic cascades, and more detail can be found there. In  
186 both models the basal level of the chain describes dynamics of a key nutrient that limits the  
187 productivity of the food chain, and we assume nutrients are added at a constant rate,  $\omega$ . Each  
188 subsequent equation then describes a different type of consumer. The first level is wholly dependent  
189 on the nutrients and could represent a primary producer such as an algal species that requires a key  
190 mineral such as silica. The second level consumes the first trophic level and is in turn consumed by a  
191 third trophic level, and so on until the apex consumer is reached. In the density dependence model  
192 (Equation 1, Table 1), the consumer  $i$  exploits the resource (trophic level  $i - 1$ ) with a constant  
193 consumption/attack rate,  $\alpha_i$ , and the conversion efficiency parameter,  $\varepsilon_i$ , determines the proportion  
194 of the resource consumed that is converted into new consumers. Under density dependence, the  
195 density of the consumer is self-regulated by the intraspecific density dependence parameter  $\lambda_i$ , which  
196 leads to an increase in death rate as the consumer density increases. In contrast, the consumer uptake  
197 regulation model (Equation 2, Table 1), assumes the effect of increasing consumers is to slow down  
198 the consumption of the resource, perhaps due to increased interference. In this case, the parameter  $v_i$ ,  
199 determines the consumer density at which the maximum per capita uptake rate is halved, defined as  
200 the density  $x_i = 1/v_i$ .

201 Using these equations, we establish food-chains comprising either three, four, or five trophic levels,  
202 and the equation for each trophic level models how the biomass or density changes over time. For  
203 simplicity we assume all key parameters (nutrient input  $\omega$ ; consumption rates  $\alpha_i$ ; conversion

204 efficiencies  $\varepsilon_i$ ; uptake regulators  $v_i$ ; density independent  $\delta_i$ , and dependent death rates  $\lambda_i$ , for trophic  
 205 level  $i$ ) do not vary over time, and we investigate the effect of stressors on equilibrium  
 206 biomasses/densities. The models do not consider any spatial structure in the community which also  
 207 remains closed to immigration from outside apart from the constant input of the nutrient. Hence these  
 208 models represent the simplest form of community dynamics that could be used to investigate the  
 209 effects of multiple stressors and how they interact.

210 *Table 1: Equations used to establish theoretical food-chains. The equations, sets, and a brief*  
 211 *description of the equivalent ecological trophic are shown.*

|     | <b>Equation Type</b>             | <b>Equation</b>                                                                                                                                  | <b>Description</b>                                   |
|-----|----------------------------------|--------------------------------------------------------------------------------------------------------------------------------------------------|------------------------------------------------------|
| 1a) | Density<br>Dependence            | $\frac{dx_n}{dt} = \alpha_n \varepsilon_n x_{n-1} x_n - \delta_n x_n - \lambda_n x_n^2$                                                          | Change in density of Apex<br>Consumer ( $x_n$ )      |
| 1b) | Density<br>Dependence            | $\frac{dx_i}{dt} = \alpha_i \varepsilon_i x_{i-1} x_i - \alpha_{i+1} x_i x_{i+1} - \delta_i x_i - \lambda_i x_i^2$                               | Change in density of Non-<br>Apex Consumer ( $x_i$ ) |
| 1c) | Density<br>Dependence            | $\frac{dx_0}{dt} = \omega - \alpha_1 x_0 x_1$                                                                                                    | Change in density of<br>Nutrients ( $x_0$ )          |
|     |                                  |                                                                                                                                                  |                                                      |
| 2a) | Consumer<br>Uptake<br>Regulation | $\frac{dx_n}{dt} = \frac{\alpha_n \varepsilon_n x_{n-1} x_n}{1 + v_n x_n} - \delta_n x_n$                                                        | Change in density of Apex<br>Consumer ( $x_n$ )      |
| 2b) | Consumer<br>Uptake<br>Regulation | $\frac{dx_i}{dt} = \frac{\alpha_i \varepsilon_i x_{i-1} x_i}{1 + v_i x_i} - \frac{\alpha_{i+1} x_i x_{i+1}}{1 + v_{i+1} x_{i+1}} - \delta_i x_i$ | Change in density of Non-<br>Apex Consumer ( $x_i$ ) |
| 2c) | Consumer<br>Uptake<br>Regulation | $\frac{dx_0}{dt} = \omega - \frac{\alpha_1 x_0 x_1}{1 + v_1 x_1}$                                                                                | Change in density of<br>Nutrients ( $x_0$ )          |

212

213 Stressors to the food chains are modelled by changing the values for parameters and comparing the  
214 resultant equilibrium densities/biomasses across all trophic levels to the equilibria for a set of baseline  
215 parameter values. Equations 1 and 2 are not mechanistic models for specific stressors, (e.g. pollution,  
216 temperature), but instead capture the net effect of stressors on the vital rates of the food web species.  
217 For simplicity, we assume each stressor has either a positive or negative effect on one vital rate, (i.e.  
218 model parameter), and we investigate how pairs of stressors interact to affect community densities.  
219 Both the baseline parameters and the parameters after perturbation are drawn from uniform  
220 distributions with ranges given in Table 2. So, for a given food chain the baseline parameters for all  
221 trophic levels are independently sampled from the distribution of values given in Table 2. The vital  
222 rate affected by each stressor is randomly selected from the possible candidates, and the intensity of  
223 its effect on the baseline rate is drawn from a uniform distribution with ranges given in Table 2. The  
224 baseline parameter set therefore represents the control community, and as in experimental studies  
225 (e.g. Matthaei et al., 2010; Davis et al., 2018) we manipulate our model communities by investigating  
226 the effect of each stressor acting alone, as well as the stressors acting in combination. From these  
227 cases we then compute the type of stressor interaction and how they combine to alter the  
228 community biomasses (see below for definitions of how stressor interactions are computed). To do  
229 this we choose one trophic level at random from the entire food chain but excluding the nutrient level.  
230 We focus on this population/trophic level and mirror it in our selection of empirical data (see below).  
231 This also means the species or trophic levels under scrutiny are not always directly affected by the  
232 stressor but could be affected solely due to a trophic cascade effect. It is also important to note that  
233 a stressor could lead to either an increase or a decrease in parameter value relative to the baseline;  
234 and that multiple stressors could act on the same, or different trophic level, but that each stressor  
235 affects only one parameter (and therefore biological process).

236 *Table 2: Explanation of the different parameters within Equations 1 and 2, with the mechanism they*  
 237 *reflect, alongside the minimum and maximum values for the ranges of baseline and stressed*  
 238 *parameter values. Each parameter is drawn from a uniform distribution  $U\sim(a, b)$  with lower limit,  $a$ ,*  
 239 *and upper limit,  $b$ .*

| Parameter  | Ecological Mechanism                                                                                              | Baseline Value Range                | Stressed Value Range                                                                      |
|------------|-------------------------------------------------------------------------------------------------------------------|-------------------------------------|-------------------------------------------------------------------------------------------|
| $\alpha$   | The rate at which a trophic level predates upon the trophic level directly below.                                 | $\alpha_b = U\sim(0.25, 0.75)$      | $U\sim(0.01, 0.99)$<br>Excluding the range:<br>$(\alpha_b - 0.025, \alpha_b + 0.025)$     |
| $\epsilon$ | The efficiency at which a trophic level can transform consumed matter into new individuals.                       | $\epsilon_b = U\sim(0.25, 0.75)$    | $U\sim(0.01, 0.99)$<br>Excluding the range:<br>$(\epsilon_b - 0.025, \epsilon_b + 0.025)$ |
| $\delta$   | The density independent mortality rate of a trophic level.                                                        | $\delta_b = U\sim(0.25, 0.75)$      | $U\sim(0.01, 0.99)$<br>Excluding the range:<br>$(\delta_b - 0.025, \delta_b + 0.025)$     |
| $\omega$   | The constant rate at which a resource, $(x_0)$ , is input into the food chain.                                    | $\omega_b = U\sim(25, 75)$          | $U\sim(1, 99)$<br>Excluding the range:<br>$(\omega_b - 2.5, \omega_b + 2.5)$              |
| $\lambda$  | The density dependent mortality rate of a trophic level.                                                          | $\lambda_b = U\sim(0.00625, 0.025)$ | N/A                                                                                       |
| $v$        | A limit to the uptake rate of a consumer through a trait-mediated response, that may be behavioural or otherwise. | $v_b = U\sim(0.05, 0.15)$           | N/A                                                                                       |

240

241 Overall, 1,320,000 different combinations, of equations, food-chain lengths, stressors pairs, and  
242 randomly selected baseline values were generated. Equilibrium densities, for each of these  
243 combinations, were calculated using Mathematica 10.4, (Wolfram Research, Inc., 2016), with  
244 equilibria and stability analyses as given in Heath et al., (2014); (for more details see Supplementary  
245 Material 1). We only consider cases where the equilibria are all stable, and feasible (i.e. all densities  
246 were positive), and only equilibrium densities for trophic levels  $x_1$  and above are included in the  
247 stressor interaction results i.e. we exclude the nutrient level from our stressor interaction analyses.  
248 Across all 1,320,000 combinations, 79.9% of the parameter sets result in the determination of  
249 equilibrium densities that are both stable and feasible, with the discarded 20.1% parameter sets  
250 resulting in at least one biologically unfeasible density/biomass. From the full set of stable and feasible  
251 communities we select at random 360,000, and for each one randomly select a single trophic level for  
252 the focus of our estimation of the stressor interaction. All subsequent analyses of the theoretical data  
253 are performed on this group of 360,000 theoretical interactions. This subsetting is required as there  
254 is a negative relationship between number of trophic levels and likelihood of the community being  
255 both stable and feasible, which biases the full dataset towards communities with only three trophic  
256 levels. The final 360,000 stressor interactions are selected with weighted probabilities to ensure  
257 approximately one third (i.e.  $\sim 120,000$ ) are from each of the three food chain lengths, and that each  
258 model (Table 1) is also approximately equally represented.

259 Unlike the empirical studies used in the meta-analyses below, the food chain models are purely  
260 deterministic, meaning there were no random fluctuations around the equilibrium densities. In effect,  
261 for any given pair of stressors, there is no sampling error in the theoretical data. Clearly, this differs  
262 from the empirical data where sampling error leads to an estimate of the densities/biomasses under  
263 investigation in the control and treatment replicate communities, and this sampling variation may lead  
264 to some stressor interactions being misclassified. For a better comparison to the empirical data, and  
265 to test the robustness of the additive null model to sampling variation, we modelled observation (or  
266 measurement) error by taking the 360,000 theoretical interactions at equilibrium from our original

267 analyses and then multiplying the biomass of each trophic level by a random number drawn from a  
268 Gaussian distribution with mean 1 and standard deviation  $\sigma$ . This process was repeated between three  
269 and six times for each treatment, analogous to the number of replicates per treatment found in our  
270 empirical data (see below). Thus, larger values for  $\sigma$  lead to larger deviations around the equilibrium  
271 biomasses, and therefore a larger observation error, with an increased likelihood that the stressor  
272 interaction is misclassified. Standard deviations,  $\sigma$ , are from one of 86 different levels, ranging from  
273  $1 \times 10^{-10}$  to 0.5, in consistent logarithmic increments, (e.g.  $8 \times 10^{-10}$ ,  $9 \times 10^{-10}$ ,  $1 \times 10^{-9}$ ,  $2 \times 10^{-9}$ , etc.).  
274 Supplementary Material 1 details a complete overview of how observation error was incorporated  
275 into the theoretical data.

276

#### 277 *Collation of Empirical Data*

278 Through use of Web of Science we searched the primary scientific literature, for papers published  
279 before 1<sup>st</sup> January 2019, which investigated the impacts of multiple stressors upon freshwater  
280 communities. In order to be incorporated, papers needed to report results where there was a factorial  
281 design, namely; (i) a control (without stressors), (ii) each stressor acting individually, (iii) the stressors  
282 acting simultaneously. Papers needed to report the mean value of the response, number of replicates,  
283 and standard deviation or standard error for each treatment in the factorial design; failure to report  
284 any of this information led to the study being excluded from our analysis. Additionally, papers were  
285 required to report at least one of the following untransformed metrics: biomass, abundance, density,  
286 or chlorophyll-a of one or more groups of organisms within the stressed community. Hence, and in  
287 line with our trophic models, the focus of our effort is directed towards studies that report the effects  
288 of stressors acting at the population and community levels. Papers often report the impacts of  
289 stressors upon multiple different groups of organisms within a community; and for these the  
290 responses of all different groups of organisms were included within the overall dataset. The different  
291 groups of organisms could comprise: populations of a single species, (e.g. *Daphnia pulex*); a group of

292 organisms within the same feeding guild, (e.g. detritivores); a group of taxonomically similar  
293 organisms, (e.g. *Ephemeroptera*, *Plecoptera*, and *Trichoptera* taxa); or a group of similar organisms,  
294 (e.g. macroinvertebrates or algae).

295 To be collated within our dataset, papers had to investigate communities comprising a minimum of  
296 two different groups of organisms. Studies investigated a wide range of different stressors, though  
297 these were subsequently grouped into broader categories of stressor, such as Temperature,  
298 Contamination, and Habitat Alteration.

299 Previous analyses have frequently focussed upon collating data for only the greatest single intensity  
300 of a stressor (e.g. Jackson et al., 2016). In contrast, where studies reported the responses of  
301 communities to multiple intensities of different stressors, data for all of the different intensities was  
302 collated. All interactions considering the different intensities of stressors were included in the overall  
303 dataset, although covariation in data due to repeated experiments across different stressor intensities  
304 were accounted for in the final meta-analyses (see section *Meta-Analytical Models*).

305 Some studies report multiple different response metrics for the same group of organisms, include the  
306 same species within multiple different groups, or report data for the same experiment over multiple  
307 different time points. Accordingly, in order to reduce correlation/covariance within the overall  
308 dataset, these interactions are removed from our analyses. For instance, interactions measuring  
309 density are prioritised over abundances, which are in turn prioritised over biomasses, or  
310 measurements of chlorophyll-a respectively. Similarly, where papers reported data for interactions  
311 over multiple different time points, only the final time point is used as this best matches our  
312 equilibrium assumption for the theoretical models.

313 Supplementary Material 2 gives a complete overview of the different search terms used to find  
314 studies, the methodology used to determine whether the data for a study could be collated, the  
315 processes for extracting and collating the data, and the process for removing interactions to prevent  
316 covariance.

317

318 *Determining of Effect Sizes and Classification of Interactions*

319 Across both the theoretical and empirical datasets, we use the same methodology for determining  
320 the classification of an interaction, with this being implemented through use of the effect size metric,  
321 Hedges'  $d$ , (Gurevitch et al., 2000). Hedge's  $d$  is frequently implemented in research investigating the  
322 impacts of multiple stressors due to its ability to estimate the standardised mean difference between  
323 the means of stressed and control samples; whilst also being unbiased by small sample sizes (Hedges  
324 & Olkin, 1985). Hedge's  $d$  is calculated through a comparison of the effect of the interaction to the  
325 sum of the effects of the stressors acting individually; namely, an additive null model. In line with  
326 current methodologies, we invert the sign of the interactions when the expected effect of the additive  
327 null model is negative (Piggott et al., 2015a). Following this methodology allows for interaction effect  
328 sizes to be compared regardless of their directionality. As such, we focus on the classification of the  
329 interaction as opposed to the absolute magnitude/polarity of the effects. Supplementary Material 3  
330 gives a complete breakdown of the equations used for calculating Hedge's  $d$ .

331 Once Hedge's  $d$  for a given interaction of stressors was calculated, we then classify the interaction into  
332 one of four types as illustrated by Figure 1 and following the convention of Jackson et al., (2016). In  
333 brief, the four interaction classifications are: (i) *Additive*, where the effect of the additive null model  
334 is statistically indistinguishable from the effect of observed interaction; (ii) *Synergistic*, where the  
335 observed interaction effect is greater than the effect of the additive null model; (iii) *Antagonistic*,  
336 where the observed interaction effect is less than the effect of the additive null model, but both effects  
337 have the same polarity; (iv) *Reversal*, where the observed interaction effect is negative but the effect  
338 of the additive null model is positive. The distinction between antagonistic and reversal interactions  
339 is relatively recent (e.g. Travers-Trolet et al., 2014; Jackson et al., 2016), with most research still using  
340 the appellation of antagonistic to refer to both antagonistic and reversal interactions (e.g. Velasco et  
341 al., 2019; Gomez Isaza et al., 2020). If Hedge's  $d$  is positive the interaction is classed as synergistic. If



342 Hedge's  $d$  is negative, the interaction is classed as either an antagonistic or reversal interaction,  
 343 though this can only be determined by comparing the effect of the additive null model to the observed  
 344 effect (as outlined above). Each value of Hedge's  $d$  has corresponding 95% confidence intervals; if  
 345 these confidence intervals incorporate 0 then an interaction is deemed to be additive. The  
 346 classification scheme outlined above is one of a number of possible choices (e.g. Crain et al., 2008;  
 347 Jackson et al., 2016), and Supplementary Material 4 details a comparison of how these different  
 348 schemes to one another.

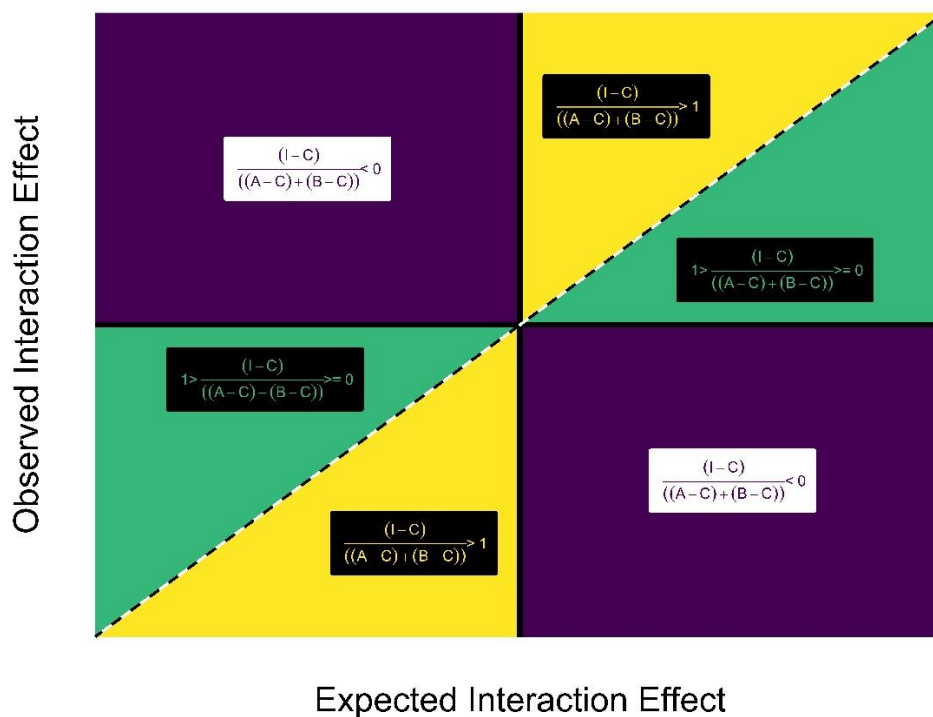

349  
 350 *Figure 1: Pictorial depiction of interaction types. Additive interactions are shown by the diagonal black*  
 351 *and white dashed line. Yellow denotes the areas occupied by synergistic interactions. Purple denotes*  
 352 *the areas occupied by reversal interactions. Green denotes the area occupied by antagonistic*  
 353 *interactions. Equations for the general classifications are shown for antagonistic, reversal, and*  
 354 *synergistic interactions. C – control, A – Only Stressor A present, B – Only Stressor B present, I – Both*  
 355 *Stressors A and B present. In order for an interaction to be classed as additive, the effect of the*  
 356 *interaction would be equal to the sum of the effects of the individual stressors, ((I-C) = (A-C)+(B-C)).*

357

358 *Vote-Counting*

359 Following the classification of all interactions, we implement a vote-counting methodology to  
360 determine the relative proportions of the interaction classes across both the theoretical and empirical  
361 datasets. To consider the effect of different strengths of sampling variation on the ability to detect the  
362 ‘true’ stressor interaction in the modelled data, we compute the frequency of interaction types for  
363 both the case with no observation error, and for the full range of observation error levels investigated.

364

365 *Meta-Analytical Models*

366 Alongside the vote-counting methodology, we determine the summary interactions class using a  
367 meta-analytical approach to both the theoretical and empirical datasets. The meta-analytical models  
368 are Weighted Multi-Level/Multi-Variate Random-Effect Models, and implemented in the *metafor*  
369 package (Viechtbauer, 2010) in R. For the empirical dataset random effects are specified as being the  
370 ID of the study group of organisms nested within the ID for study. The random effects are specified in  
371 order to account for both between- and within-study variation. Additionally, some studies consider  
372 multiple intensities of one or more stressors, and as such, calculations of the interaction class for each  
373 intensity of stressor use the same control. To account for any covariance between the different  
374 intensities of a single stressor, we incorporate covariance-variance matrices within the meta-analytical  
375 models. For the empirical dataset, mixed effect models are also conducted with the fixed effects of  
376 stressor pair or organism group (see Supplementary Material 5). The summary effect size for the  
377 theoretical dataset is also determined using a similar process. However, due to computational  
378 limitations caused by the number of interactions under analysis (360,000 interactions at each level of  
379 observation error), meta-analytical models for the theoretical data are fitted using the *lm* function.

380 The models applied to both the theoretical and empirical datasets are explained in further detail  
381 within Supplementary Material 5.

382 The overall effect from a meta-analysis needs to be checked for consistency among effect sizes,  
383 termed as heterogeneity (Nakagawa et al., 2017). We use the  $I^2$  statistic, which is bounded between  
384 0% and 100%, with 25%, 50%, and 75% being suggested as levels for respectively, low, medium, and  
385 high heterogeneity (Higgins et al. 2003). Ecological meta-analyses often report high levels of  
386 heterogeneity (Senior et al., 2016), perhaps due to the variation in study organisms common to the  
387 questions being asked, and we might expect a high value here due to both range of study organism  
388 and range of stressor type. To explore the potential causes of heterogeneity within the empirical meta-  
389 analysis, we conduct separate meta-analyses upon two sub-groups of the dataset, a similar process to  
390 running a meta-regression (Nakagawa et al., 2017), using organism group (i.e. producer or consumer)  
391 as the categorical moderators to explore heterogeneity (see Supplementary Material 6). We also  
392 consider publication bias (see Supplementary Material 6); though it should be noted that common  
393 tests for publication bias within meta-analyses can be limited by high heterogeneity (Nakagawa et al.,  
394 2017).

395

#### 396 *Comparison of Theoretical and Empirical Data*

397 Using the methods outlined above we ask whether the theoretical models are good predictors for (1)  
398 the respective frequencies of the different interaction types; and (2) the summary interaction class  
399 returned from the meta-analyses of the freshwater experimental literature on the effects of co-  
400 occurring stressors. Under the assumption that all empirical studies involve some observation  
401 (measurement) error we compare the empirical data to the model generated interactions that include  
402 observation error levels between  $1 \times 10^{-2}$  and 0.5 (a total of 5,040,000 modelled interactions).

403

## 404 **Results**

### 405 *Stressor Interactions within Theoretical Data*

406 We find no strong difference between classification of stressor interactions from either form of food  
407 chain model (Table 1), nor between the different length food chains (see Supplementary Material 1),  
408 showing the frequencies of interaction are robust to these details of the models. For the entire  
409 theoretical dataset of 360,000 interactions, (comprising both Consumer Uptake Regulation and  
410 Density Dependence Equations, and across food chains of three, four and five levels), without  
411 observation error, antagonistic and synergistic interactions are the most frequently assigned (0.483  
412 and 0.480 respectively), followed by reversal (0.0288), and finally additive interactions (0.00856).  
413 However, these interaction frequencies are very sensitive to observation error. Increasing observation  
414 error leads to more interactions being classified as additive, (the null model), and at likely realistic  
415 levels, additive interactions are clearly dominant (Figure 2a).

416 The summary effect size, and summary interactions class as generated from the meta-analytical  
417 framework also shows some sensitivity to observation error, although in these analyses the outcome  
418 is rather different (Figure 2b). For low levels of observation error, the 95% confidence intervals of the  
419 summary effect size overlap zero, indicative of an additive summary interaction class. This occurs  
420 because the frequency and magnitudes of synergistic (positive effect size) and antagonistic/reversal  
421 (negative effect sizes) interactions are approximately equal for low observation error (Figure 2a), and  
422 although there is a large variance in effect sizes due to low sampling error (See Supplementary  
423 Material 1), the effects sizes for individual interactions are approximately centred on zero. However,  
424 with increasing observation error the summary effect sizes become increasingly more negative, and  
425 confidence intervals for these summary effect sizes do not overlap zero, indicating an  
426 antagonistic/reversal summary interaction class. Further inspection shows an increase in the  
427 proportion of negative effect sizes as observation error increases (Figure 2c), with this being mirrored  
428 by a decreasing summary effect size (Figure 2b). Although not so obvious due to the dominance of

429 additive interactions, a similar trend can be observed in the frequencies of interaction types at higher  
430 observation errors, with synergistic interactions heading towards 0 frequency faster than antagonistic  
431 interactions (Figure 2a). Hence, analyses of our model results with varying levels of observation error  
432 suggest synergies in pairs of ecosystem stressors may be under-reported in many empirical studies.

433

#### 434 *Theoretical predictions*

435 In summary, our theoretical analyses lead us to predict that at likely levels of sampling variation we  
436 should expect the empirical data to be dominated by additive interactions for individual interactions  
437 (Figure 2a), but in contrast the summary effect sizes computed across a large body of such studies  
438 should indicate a dominant role for antagonistic, or reversal, interactions.

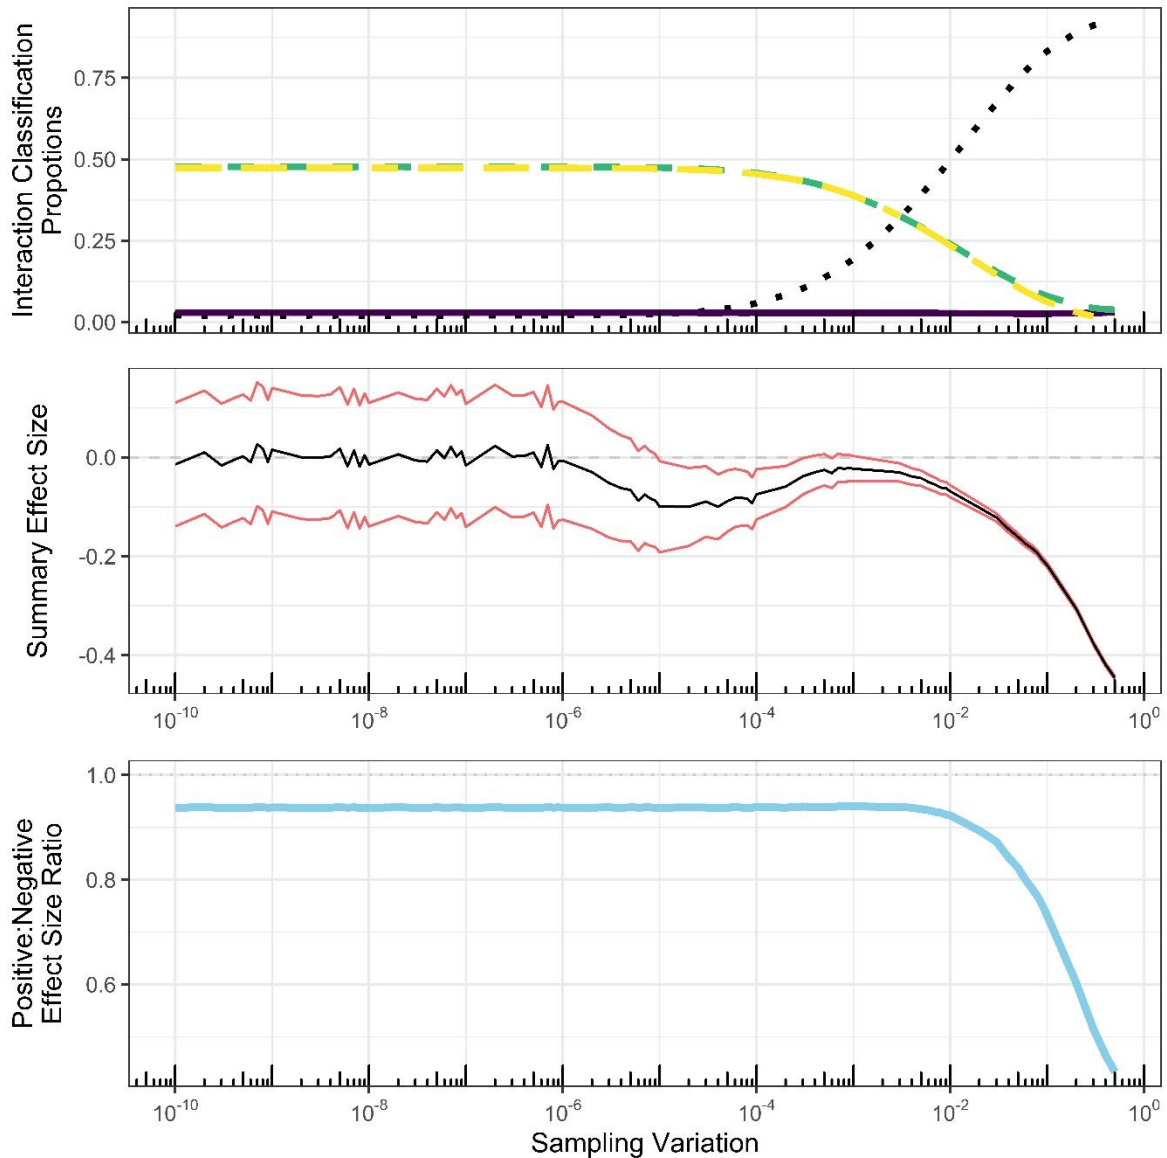

439

440 *Figure 2: The effect of sampling variation on the stressor interaction categorisation, and summary*  
441 *meta-analytic effect sizes in the theoretical data. (Top Panel) Proportions of the different interaction*  
442 *classes for the 360,000 theoretical interactions at each level of sampling variation. Dotted black line*  
443 *denotes additive interactions. Green short-dashed line indicates antagonistic interactions. Yellow long-*  
444 *dashed line denotes synergistic interactions. Purple line indicates reversal interactions. (Middle Panel)*  
445 *Summary effect sizes for the 360,000 theoretical interactions, at each level of sampling variation. Black*  
446 *lines denote summary effect sizes, and red lines denote 95% confidence intervals. (Bottom Panel) Ratio*  
447 *of positive to negative summary effect sizes at each level of sampling variation (observation error).*

448 *Stressor Interactions within Freshwater Empirical Data*

449 Our literature search within Web of Science returned 1805 papers that meet our search criteria. Of  
450 these, only 58 meet our criteria for inclusion. They include 546 interactions summarised in Figure 3 to  
451 show the frequency of different interaction classifications and the overall summary effect sizes and  
452 interaction classes. Additive interactions were the most frequent, (0.830), followed by antagonistic,  
453 (0.0989), reversal, (0.0476), and finally synergistic, (0.0238), interactions (Figure 3a).

454 Additionally, the summary effect size for the entire dataset is negative, ( $-0.646 \pm 0.259$ ), with  
455 confidence intervals that do not overlap zero, indicative of an antagonistic/reversal summary  
456 interaction class (Figure 3b).

457 Our meta-analysis reports medium-level heterogeneity, ( $I^2 = 47.0\%$ ), though this is considerably lower  
458 than the mean heterogeneity, ( $I^2 = 91.7\%$ ) found in an analysis of previous ecological meta-analyses  
459 (Senior et al., 2016). Two additional meta-analyses, conducted upon sub-groups of the empirical  
460 dataset, with the categorical moderator of organism group as means of exploring this heterogeneity  
461 (Nakagawa et al., 2017) fail to uncover any source of this heterogeneity (see Supplementary Material  
462 6).

463 *Comparison of Empirical and Theoretical Interaction Classifications*

464 Overall, we find close agreement between our theoretical models with biologically reasonable levels  
465 of observation error and the freshwater empirical data (Figure 3). Summary effect sizes are negative  
466 indicating antagonistic or reversal interactions (Figure 3b); whereas the vote counting results highlight  
467 how individual interactions tend to return an additive classification (Figure 3a), probably due to the  
468 sampling errors, and relatively low sample sizes, in both data sets.

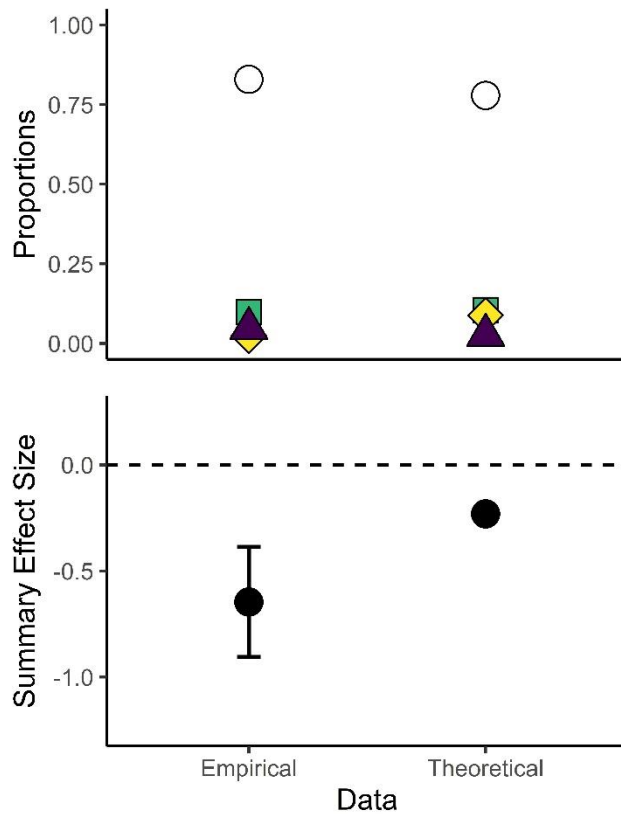

469

470 *Figure 3: a) Proportions of the different interaction classes, and b) summary effect sizes for the*  
471 *empirical and theoretical dataset. The empirical dataset comprised 546 interactions, while the*  
472 *theoretical dataset comprised all interactions using sampling variations between  $1 \times 10^{-2}$  and 0.5.*  
473 *(5,040,000 interactions). White circles denote additive interactions. Green squares denote antagonistic*  
474 *interactions. Yellow diamonds denote synergistic interactions. Purple triangles denote reversal*  
475 *interactions.*

476

## 477 **Discussion**

478 There has been much interest in understanding and cataloguing the joint effects of stressors on  
479 ecological communities and ecosystems (Schäfer & Piggott 2018; Thompson et al. 2018b), but to date  
480 there has been relatively little guidance from ecological theory. Here we close this gap by analysing a  
481 food chain model using classical ecological theory and comparing it to a meta-analysis on a large



482 dataset for freshwater ecosystems. Our theoretical results show remarkable agreement with the  
483 empirical analyses, for both vote counting results and summary effect sizes, which generate different  
484 interpretations of how stressors are likely to interact (Figures 2, 3). On the one hand, our vote counting  
485 analyses suggest additive interactions to be by far the most dominant stressor interactions in  
486 freshwater communities; but on the other hand our meta-analysis shows antagonism to be the  
487 summary interaction class. Our theoretical model helps to understand why this might be the case, and  
488 highlights deficiencies in the commonly used additive null model that is used to classify the joint  
489 effects of ecosystem stressors. In particular our model results show the additive null model is (a)  
490 sensitive to sampling variation with even realistically small levels leading to very frequent failure to  
491 correctly reject the null model (type II statistical errors); (b) potentially less likely to correctly report  
492 synergistic interactions compared to either antagonistic or reversal interactions in the meta-analytical  
493 framework. We believe that once these statistical aspects are considered, so-called ‘ecological  
494 surprises’ (*sensu* Paine et al. 1998) may in fact be more prevalent in both our freshwater dataset, and  
495 more widely.

496

#### 497 *Theoretical predictions*

498 The agreement between theoretical models and empirical data is remarkable given the biological  
499 simplicity of the model and how it is not tailored to any one type of stressor or community. However,  
500 our approach should be viewed as one that aims to explain the emergent patterns across studies  
501 rather than be used to predict the joint effects of stressors in a particular empirical system, in which  
502 case a more detailed and specific model is more appropriate (e.g. Brown et al. 2013; Galic et al. 2018).  
503 Our food chain models imply that, given adequate sample sizes (see below), we should expect  
504 synergistic and antagonistic interactions to co-dominate at the population and trophic level, whereas  
505 additive interactions and reversals should be relatively rare. These messages appear to be echoed in  
506 the few other theoretical studies on stressor interactions in ecological communities (e.g. Travers-

507 Trolet et al. 2014; Thompson et al. 2018a; Haller-Bull & Bode 2019). This agreement is despite a variety  
508 of key differences in the model assumptions. In particular, Haller-Bull and Bode (2019) focussed on  
509 populations rather than multispecies communities, but found dominant roles for synergistic and  
510 antagonistic interactions, with additive interactions occurring most frequently for stressors affecting  
511 the carrying capacity. Similar to our model, Thompson et al. (2018a) did focus on multispecies  
512 communities, but they assumed biological interactions were constant, whereas we allow interactions  
513 (consumption and conversion rates) to be modified by stressors, an assumption that seems likely to  
514 be met on a regular basis. For example, stressors have been shown to influence resource competition  
515 (Kroeker et al. 2013); susceptibility to parasitism in oysters (Lenihan et al. 1999); and modify the flow  
516 of energy through aquatic food webs by inducing changes in trophic links (Schrama et al. 2017).  
517 Despite this difference, Thompson et al. (2018a) found additive interactions were most prominent  
518 when species facilitated one another (i.e. positive species interactions), but that synergy or  
519 antagonism in combined stressor effects on species richness or community biomass were more  
520 common when species interactions are negative (competition or resource use). Finally, Fu et al. (2018)  
521 used four ecosystem models for fisheries to investigate the combined effects of fishing and primary  
522 productivity across a number of modelled real-life fisheries. They also found a reduced role for  
523 additive interactions, with an increased risk of stressor pair synergism at lower trophic levels, whereas  
524 antagonistic interactions (less than additive, but in the same direction as the additive expectation)  
525 where more likely at higher trophic levels.

526 The apparent rarity of additive interactions in all of these models might appear at odds with the  
527 possible interpretation that two stressors acting on different species within a community could lead  
528 to such a joint effect (Jackson et al. 2016). However, feedbacks in the food web, like those found in  
529 our models, mean that even if a species is unaffected directly by a stressor, it is highly likely that top-  
530 down or bottom up effects will lead to indirect interactions for many species, and as a result additive  
531 interactions are extremely hard to generate in the absence of sampling variation (e.g. observation  
532 error). Indeed, we predict that additive interactions might only truly occur in scenarios where species

533 in different and very weakly interacting sub-communities are affected by different stressors, or, as  
534 found by Thompson et al. (2018a), where species interactions are predominantly positive. However,  
535 despite a growing body of theoretical predictions we are not aware of any empirical test of the  
536 previous models. Our models have therefore extended earlier results by focussing on changes in  
537 biological interactions caused by the stressors, and also incorporating sampling variation as a  
538 parameter of interest, something that greatly aided the interpretation of the empirical results. We  
539 believe there will be an increasing role of theory in generating hypotheses for the ways in which  
540 stressors interact (De Laender 2018), and the most progress will be made when the theory is  
541 developed so it can be tested directly against the data, much as we have done here.

542

#### 543 *Sample size*

544 The choice of null model is hotly debated within ecological stressor research (Schäfer & Piggott 2018),  
545 and it has been argued that null models should be able to accurately predict the combined effects of  
546 stressors (Orr et al. 2020). However, our work does add some cautionary notes to this view since it is  
547 clear that the additive null model for stressor interactions is very sensitive to sampling variation, and  
548 for likely realistic levels of sampling variation it is hard to correctly reject the null model (Figure 2).  
549 Given that most experiments have low sample sizes (a mean of 3.83 with a maximum of 16 per  
550 treatment in our empirical data), we feel it is premature to conclude that most stressor interactions  
551 are *truly* additive in the freshwater data we collected. This view is reinforced by our meta-analysis that  
552 returned a negative summary effect size implying an overall antagonistic, or reversal, summary  
553 interaction class within in experimental results, a pattern that was mirrored in previous analyses of  
554 freshwater stressor experiments (Jackson et al. 2016; Lange et al. 2018). Also, given that our theory,  
555 in the absence of sampling variation, showed a near equal frequency of synergistic and antagonistic  
556 interactions (Figure 2a), there appears to be a potential trend against detecting synergies in co-  
557 occurring stressors in the meta-analytical framework (Figure 2b). The dual effects of this potential

558 trend and sensitivity to sampling variation may be key reasons why stressor synergies are not as often  
559 reported as might be expected (Darling and Côté 2008; Côté et al. 2016), although as we discuss below,  
560 other reasons may also contribute, and of course, we cannot rule out that the empirical results do  
561 truly reflect the underlying interactions. However, our finding of sensitivity to sample size is more  
562 general than either our theoretical results, or our freshwater dataset, and we suggest future work  
563 should investigate other null models for their robustness to these (and other) features. For example,  
564 is the additive null model particularly conservative in its detection of synergies, and are there better  
565 alternatives? Such analyses would build on previous descriptions of the null models (e.g. Sih et al.  
566 1998; Folt et al. 1999; Sih et al. 2004) and would be particularly useful if analyses considered the effect  
567 of sample size on statistical power, as this will help guide future empirical studies to improve the  
568 detection rate of non-null stressor interactions. Furthermore, a previous theoretical analysis,  
569 implementing an alternate framework to that used here, found that synergistic interactions only  
570 occurred under specific conditions (Haller-Bull & Bode 2019). Accordingly, future theoretical studies  
571 may wish to investigate the controls that govern the frequency of synergistic interactions, and in doing  
572 so determine whether such patterns are general or more tailored to specific models. Overall, it is  
573 important to note that when comparing observed interactions to a null model we are determining  
574 whether it is possible to reject the null model. Similarly, a failure to reject the null model does not  
575 mean that the stressors interact in an additive manner, only that we are unable to find a statistically  
576 significant difference between what is observed and what is predicted. Ultimately, acknowledging the  
577 difference between these two statements, and the corresponding interpretation of a null model, is  
578 crucial when attempting to further our collective understanding of these statistical tools.

579

#### 580 *Lack of generalities across meta-analyses*

581 Very few general patterns have emerged from previous meta-analyses on stressor interactions (Côté  
582 et al. 2016), but there are a number of reasons as to why this is the case (see also Côté et al. 2016).

583 Firstly, the studies have been carried out across all the different major realms (marine, terrestrial, and  
584 freshwater) and there could be heterogeneity simply because different stressor interactions might  
585 prevail in the different realms. Secondly, there is both a range of stressors considered, and a naturally  
586 large taxonomic variation in study organisms cutting across a wide range of life histories and trophic  
587 structures. For example, it could be that long-lived and short-lived organisms experience different  
588 effects, or for instance, that trophic level is important to the type of stressor interaction that tends to  
589 occur (Thompson et al. 2018a; see Supplementary Material 5), and that different combinations of  
590 stressors will give rise to different forms of interaction (e.g. Jackson et al. 2016, see Supplementary  
591 Material 5). Thirdly, different meta-analyses have considered different levels of biological  
592 organisation, from individuals, to populations communities and ecosystems (reviewed by Crain et al.  
593 2008 for marine ecosystems), and we can expect different interactions to occur for the same stressor  
594 pair across the levels of organisation (e.g. Galic et al. 2018). Fourthly, there is a profusion of null  
595 models and classification schemes for stressor interactions (Schäfer & Piggott 2018; Orr et al. 2020),  
596 making comparisons between studies very difficult, especially when we do not know the relationships  
597 between different null models. For example, under the same dataset, when should we expect  
598 synergistic and antagonistic interactions to be reclassified when we move from, say, the additive null  
599 model, to the multiplicative null model? Finally, we note that there is variation in the statistical  
600 methodologies implemented across meta-analyses. For instance, the manner in which interactions are  
601 classified can vary between methodologies (e.g. Crain et al. 2008 versus Darling & Côté 2008) which  
602 may potentially result in contrasting frequencies of the different interaction classifications being  
603 reported. We believe the first step to uncovering any generalities across meta-analyses is to eliminate  
604 any roles that methodological differences are playing, and only then can we focus on the more  
605 interesting biological causes (i.e. sources 1-4) for similarities and differences in the ways multiple  
606 stressors combine across different ecological communities.

607 *Mechanistic understanding of multiple stressors*

608 Here, we sought an to answer to the question of *how* multiple stressors interact. This approach, when  
609 applied across both theoretical and empirical datasets can allow us to discern what might be expected  
610 across the interactions of multiple stressors. However, future research may seek to answer the  
611 question of *why* multiple stressors interact in the manner that they do. Undoubtedly, these two  
612 questions are entwined, with the answers to each of these questions highly likely to be dependent  
613 upon the other. However, while the use of null models is essential in determining the combined effect  
614 of multiple stressors (Thompson et al. 2018b), the adoption of a mechanistic approach to investigating  
615 multiple stressors may provide novel insights which address these joint questions (De Laender 2018;  
616 Schäfer & Piggott 2018). For instance, a mechanistic understanding may allow for responses such as  
617 co-tolerance or co-susceptibility (Todgham & Stillman 2013) to stressors to be more thoroughly  
618 understood from an ecological perspective. Ultimately, such an understanding is likely to require a  
619 large amount of empirical data to fully understand; however, there is ample scope for theoretical  
620 ecology to help fill this gap in our collective understanding of multiple stressors, and to generate  
621 specific hypotheses to be tested. Similarly, a mechanistic understanding of multiple stressor  
622 interactions would prove invaluable when mitigating the effects of stressors or implementing  
623 conservation initiatives.

624

## 625 *Conclusions*

626 Here we have detailed the first empirical test of general theoretical predictions for how multiple  
627 stressors interact across a large number of freshwater community case studies. Our empirical results  
628 suggest that additive interactions are pervasive at the study level, but that meta-analyses reveal a  
629 summary antagonistic, or reversal, interaction class for the entire freshwater community dataset.  
630 However, our theory suggests these results may be reflecting sampling variation rather than any  
631 underlying stressor interaction, and that so-called ecological surprises may be far more common than  
632 empirical analyses are suggesting, with the theoretical results indicating similar frequencies of

633 antagonistic and synergistic interactions. Predicting the ways multiple stressors interact is key when  
634 attempting to mitigate their effects, with the class of observed interaction potentially outlining  
635 whether the removal of a stressor will have a beneficial, limited, or detrimental impact to the system  
636 (Brown et al. 2013; Côté et al. 2016). Our results show the value of developing a theoretical framework  
637 for predicting and understanding environmental stressor interactions, and we hope more general  
638 theory that makes specific predictions based upon ecological mechanisms (e.g. De Laender 2018; Fu  
639 et al. 2018; Thompson et al. 2018a) will be developed *and* tested in the future. However, our results  
640 also highlight the need to better understand the strengths and limitations of the null models that are  
641 used to test classify the cumulative effects of community stressors, and we also believe a unified  
642 approach to the meta-analyses of individual studies will increase our understanding of how  
643 environmental stressors combine.

644

#### 645 **Acknowledgements**

646 We thank Rory Gibb, Michelle Jackson, and Tim Newbold for thought-provoking discussions. This  
647 research was part-funded by the Natural Environment Research Council grant NE/M010481/1.

648

649

650 **References**

651 Ban, S.S., Graham, N.A. and Connolly, S.R., 2014. Evidence for multiple stressor interactions and  
652 effects on coral reefs. *Global Change Biology*, 20(3), pp.681-697.

653 Bancroft, B.A., Baker, N.J. and Blaustein, A.R., 2008. A meta-analysis of the effects of ultraviolet B  
654 radiation and its synergistic interactions with pH, contaminants, and disease on amphibian  
655 survival. *Conservation Biology*, 22(4), pp.987-996.

656 Birk, S., Chapman, D., Carvalho, L., Spears, B.M., Andersen, H.E., Argillier, C., Auer, S., Baattrup-  
657 Pedersen, A., Banin, L., Beklioglu, M. and Bondar-Kunze, E., 2020. Impacts of multiple stressors on  
658 freshwater biota across spatial scales and ecosystems. *Nature Ecology & Evolution*, pp.1-8.

659 Brown, C.J., Saunders, M.I., Possingham, H.P. and Richardson, A.J., 2013. Managing for  
660 interactions between local and global stressors of ecosystems. *PLoS One*, 8(6), p.e65765.

661 Christensen, M.R., Graham, M.D., Vinebrooke, R.D., Findlay, D.L., Paterson, M.J. and Turner, M.A.,  
662 2006. Multiple anthropogenic stressors cause ecological surprises in boreal lakes. *Global Change  
663 Biology*, 12(12), pp.2316-2322.

664 Côté, I.M., Darling, E.S. and Brown, C.J., 2016. Interactions among ecosystem stressors and their  
665 importance in conservation. *Proceedings of the Royal Society B: Biological Sciences*, 283(1824),  
666 p.20152592.

667 Crain, C.M., Kroeker, K. and Halpern, B.S., 2008. Interactive and cumulative effects of multiple  
668 human stressors in marine systems. *Ecology Letters*, 11(12), pp.1304-1315.

669 Darling, E.S. and Côté, I.M., 2008. Quantifying the evidence for ecological synergies. *Ecology  
670 Letters*, 11(12), pp.1278-1286.

671 Davis, S.J., Mellander, P.E., Kelly, A.M., Matthaei, C.D., Piggott, J.J. and Kelly-Quinn, M., 2018.  
672 Multiple-stressor effects of sediment, phosphorus and nitrogen on stream macroinvertebrate  
673 communities. *Science of the Total Environment*, 637, pp.577-587.



- 674 De Laender, F., 2018. Community-and ecosystem-level effects of multiple environmental change  
675 drivers: Beyond null model testing. *Global Change Biology*, 24(11), pp.5021-5030.
- 676 Dirzo, R., Young, H.S., Galetti, M., Ceballos, G., Isaac, N.J. and Collen, B., 2014. Defaunation in the  
677 Anthropocene. *Science*, 345(6195), pp.401-406.
- 678 Dudgeon, D., Arthington, A. H., Gessner, M. O., Kawabata, Z.-I., Knowler, D. J., Lévêque, C., ...  
679 Sullivan, C. A. (2006). Freshwater biodiversity: Importance, threats, status and conservation  
680 challenges. *Biological Reviews*, 81, 163– 182.
- 681 Folt, C.L., Chen, C.Y., Moore, M.V. and Burnaford, J., 1999. Synergism and antagonism among  
682 multiple stressors. *Limnology and Oceanography*, 44(3), pp.864-877.
- 683 França, F.M., Benkwitt, C.E., Peralta, G., Robinson, J.P., Graham, N.A., Tylianakis, J.M., Berenguer,  
684 E., Lees, A.C., Ferreira, J., Louzada, J. and Barlow, J., 2020. Climatic and local stressor interactions  
685 threaten tropical forests and coral reefs. *Philosophical Transactions of the Royal Society B*,  
686 375(1794), p.20190116.
- 687 Fu, C., Travers-Trolet, M., Velez, L., Gruss, A., Bundy, A., Shannon, L.J., Fulton, E.A., Akoglu, E.,  
688 Houle, J.E., Coll, M. and Verley, P., 2018. Risky business: The combined effects of fishing and  
689 changes in primary productivity on fish communities. *Ecological Modelling*, 368, pp.265-276.
- 690 Galic, N., Sullivan, L.L., Grimm, V. and Forbes, V.E., 2018. When things don't add up: quantifying  
691 impacts of multiple stressors from individual metabolism to ecosystem processing. *Ecology*  
692 *Letters*, 21(4), pp.568-577.
- 693 Geldmann, J., Joppa, L.N. and Burgess, N.D., 2014. Mapping change in human pressure globally on  
694 land and within protected areas. *Conservation Biology*, 28(6), pp.1604-1616.
- 695 Gomez Isaza, D.F.G., Cramp, R.L. and Franklin, C.E., 2020. Living in polluted waters: A meta-analysis  
696 of the effects of nitrate and interactions with other environmental stressors on freshwater taxa.  
697 *Environmental Pollution*, p.114091.

- 698 Graham, M.D. and Vinebrooke, R.D., 2009. Extreme weather events alter planktonic communities  
699 in boreal lakes. *Limnology and Oceanography*, 54(6), pp.2481-2492.
- 700 Gruner, D.S., Smith, J.E., Seabloom, E.W., Sandin, S.A., Ngai, J.T., Hillebrand, H., Harpole, W.S.,  
701 Elser, J.J., Cleland, E.E., Bracken, M.E. and Borer, E.T., 2008. A cross-system synthesis of consumer  
702 and nutrient resource control on producer biomass. *Ecology Letters*, 11(7), pp.740-755.
- 703 Gurevitch, J., Morrison, J.A. and Hedges, L.V., 2000. The interaction between competition and  
704 predation: a meta-analysis of field experiments. *The American Naturalist*, 155(4), pp.435-453.
- 705 Halpern, B.S., Walbridge, S., Selkoe, K.A., Kappel, C.V., Micheli, F., D'agrosa, C., Bruno, J.F., Casey,  
706 K.S., Ebert, C., Fox, H.E. and Fujita, R., 2008. A global map of human impact on marine ecosystems.  
707 *Science*, 319(5865), pp.948-952.
- 708 Halpern, B.S., Frazier, M., Potapenko, J., Casey, K.S., Koenig, K., Longo, C., Lowndes, J.S.,  
709 Rockwood, R.C., Selig, E.R., Selkoe, K.A. and Walbridge, S., 2015. Spatial and temporal changes in  
710 cumulative human impacts on the world's ocean. *Nature Communications*, 6(1), pp.1-7.
- 711 Harvey, B.P., Gwynn-Jones, D. and Moore, P.J., 2013. Meta-analysis reveals complex marine  
712 biological responses to the interactive effects of ocean acidification and warming. *Ecology and*  
713 *Evolution*, 3(4), pp.1016-1030.
- 714 He, F., Zarfl, C., Bremerich, V., David, J.N., Hogan, Z., Kalinkat, G., Tockner, K. and Jähnig, S.C., 2019.  
715 The global decline of freshwater megafauna. *Global Change Biology*.
- 716 Heath, M.R., Speirs, D.C. and Steele, J.H., 2014. Understanding patterns and processes in models  
717 of trophic cascades. *Ecology Letters*, 17(1), pp.101-114.
- 718 Hecky, R.E., Mugidde, R., Ramlal, P.S., Talbot, M.R. and Kling, G.W., 2010. Multiple stressors cause  
719 rapid ecosystem change in Lake Victoria. *Freshwater Biology*, 55, pp.19-42.
- 720 Hedges, L. V., and I. Olkin., 1985. Statistical methods for meta-analysis. *Academic Press, New York*.

- 721 Higgins, J.P., Thompson, S.G., Deeks, J.J. and Altman, D.G., 2003. Measuring inconsistency in meta-  
722 analyses. *BMJ*, 327(7414), pp.557-560.
- 723 Hodgson, E. E., and Halpern, B. S. (2018). Investigating cumulative effects across ecological scales.  
724 *Conservation Biology*, 33, 22–32. doi: 10.1111/cobi.13125
- 725 Jackson, M.C., Loewen, C.J., Vinebrooke, R.D. and Chimimba, C.T., 2016. Net effects of multiple  
726 stressors in freshwater ecosystems: a meta-analysis. *Global Change Biology*, 22(1), pp.180-189.
- 727 Kroeker, K.J., Kordas, R.L., Crim, R., Hendriks, I.E., Ramajo, L., Singh, G.S., Duarte, C.M. and Gattuso,  
728 J.P., 2013. Impacts of ocean acidification on marine organisms: quantifying sensitivities and  
729 interaction with warming. *Global Change Biology*, 19(6), pp.1884-1896.
- 730 Kroeker, K.J., Kordas, R.L. and Harley, C.D., 2017. Embracing interactions in ocean acidification  
731 research: confronting multiple stressor scenarios and context dependence. *Biology Letters*, 13(3),  
732 p.20160802.
- 733 Lange, K., Bruder, A., Matthaei, C.D., Brodersen, J. and Paterson, R.A., 2018. Multiple-stressor  
734 effects on freshwater fish: Importance of taxonomy and life stage. *Fish and Fisheries*, 19(6),  
735 pp.974-983.
- 736 Lenihan, H.S., Micheli, F., Shelton, S.W. and Peterson, C.H., 1999. The influence of multiple  
737 environmental stressors on susceptibility to parasites: an experimental determination with  
738 oysters. *Limnology and Oceanography*, 44(3), pp.910-924.
- 739 Malaj, E., Peter, C., Grote, M., Kühne, R., Mondy, C.P., Usseglio-Polatera, P., Brack, W. and Schäfer,  
740 R.B., 2014. Organic chemicals jeopardize the health of freshwater ecosystems on the continental  
741 scale. *Proceedings of the National Academy of Sciences*, 111(26), pp.9549-9554.
- 742 Matthaei, C.D., Piggott, J.J. and Townsend, C.R., 2010. Multiple stressors in agricultural streams:  
743 interactions among sediment addition, nutrient enrichment and water abstraction. *Journal of*  
744 *Applied Ecology*, 47(3), pp.639-649.

- 745 Nakagawa, S., Noble, D.W., Senior, A.M. and Lagisz, M., 2017. Meta-evaluation of meta-analysis:  
746 ten appraisal questions for biologists. *BMC Biology*, 15(1), pp.1-14.
- 747 Newbold, T., Hudson, L.N., Hill, S.L., Contu, S., Lysenko, I., Senior, R.A., Börger, L., Bennett, D.J.,  
748 Choimes, A., Collen, B. and Day, J., 2015. Global effects of land use on local terrestrial biodiversity.  
749 *Nature*, 520(7545), pp.45-50.
- 750 Ormerod, S.J., Dobson, M., Hildrew, A.G. and Townsend, C., 2010. Multiple stressors in freshwater  
751 ecosystems. *Freshwater Biology*, 55, pp.1-4.
- 752 Orr, J.A., Vinebrooke, R.D., Jackson, M.C., Kroeker, K.J., Kordas, R.L., Mantyka-Pringle, C., Van den  
753 Brink, P.J., De Laender, F., Stoks, R., Holmstrup, M. and Matthaei, C.D., 2020. Towards a unified  
754 study of multiple stressors: divisions and common goals across research disciplines. *Proceedings*  
755 *of the Royal Society B*, 287(1926), p.20200421.
- 756 Paine, R.T., Tegner, M.J. and Johnson, E.A., 1998. Compounded perturbations yield ecological  
757 surprises. *Ecosystems*, 1(6), pp.535-545.
- 758 Piggott, J.J., Townsend, C.R. and Matthaei, C.D., 2015a. Reconceptualizing synergism and  
759 antagonism among multiple stressors. *Ecology and Evolution*, 5(7), pp.1538-1547.
- 760 Piggott, J.J., Salis, R.K., Lear, G., Townsend, C.R. and Matthaei, C.D., 2015b. Climate warming and  
761 agricultural stressors interact to determine stream periphyton community composition. *Global*  
762 *Change Biology*, 21(1), pp.206-222.
- 763 Przeslawski, R., Byrne, M. and Mellin, C., 2015. A review and meta-analysis of the effects of  
764 multiple abiotic stressors on marine embryos and larvae. *Global Change Biology*, 21(6), pp.2122-  
765 2140.
- 766 Reid, A. J., Carlson, A. K., Creed, I. F., Eliason, E. J., Gell, P. A., Johnson, P. T. J., ... Cooke, S. J. (2019).  
767 Emerging threats and persistent conservation challenges for freshwater biodiversity. *Biological*  
768 *Reviews*, 94, 849– 873.

- 769 Reisinger, L.S. and Lodge, D.M., 2016. Parasites alter freshwater communities in mesocosms by  
770 modifying invasive crayfish behavior. *Ecology*, 97(6), pp.1497-1506.
- 771 Rosenblatt, A.E. and Schmitz, O.J., 2014. Interactive effects of multiple climate change variables  
772 on trophic interactions: a meta-analysis. *Climate Change Responses*, 1(1), p.8.
- 773 Sala, O.E., Chapin, F.S., Armesto, J.J., Berlow, E., Bloomfield, J., Dirzo, R., Huber-Sanwald, E.,  
774 Huenneke, L.F., Jackson, R.B., Kinzig, A. and Leemans, R., 2000. Global biodiversity scenarios for  
775 the year 2100. *Science*, 287(5459), pp.1770-1774.
- 776 Schäfer, R.B. and Piggott, J.J., 2018. Advancing understanding and prediction in multiple stressor  
777 research through a mechanistic basis for null models. *Global Change Biology*, 24(5), pp.1817-1826.
- 778 Schrama, M., Barmantlo, S.H., Hunting, E.R., van Logtestijn, R.S., Vijver, M.G. and van Bodegom,  
779 P.M., 2017. Pressure-induced shifts in trophic linkages in a simplified aquatic food web. *Frontiers*  
780 *in Environmental Science*, 5, p.75.
- 781 Scheffers, B.R., De Meester, L., Bridge, T.C., Hoffmann, A.A., Pandolfi, J.M., Corlett, R.T., Butchart,  
782 S.H., Pearce-Kelly, P., Kovacs, K.M., Dudgeon, D. and Pacifici, M., 2016. The broad footprint of  
783 climate change from genes to biomes to people. *Science*, 354(6313).
- 784 Schmitz, O.J., 2007. Predator diversity and trophic interactions. *Ecology*, 88(10), pp.2415-2426.
- 785 Senior, A.M., Grueber, C.E., Kamiya, T., Lagisz, M., O'Dwyer, K., Santos, E.S. and Nakagawa, S.,  
786 2016. Heterogeneity in ecological and evolutionary meta-analyses: its magnitude and  
787 implications. *Ecology*, 97(12), pp.3293-3299.
- 788 Sih, A., Englund, G. and Wooster, D., 1998. Emergent impacts of multiple predators on prey. *Trends*  
789 *in Ecology & Evolution*, 13(9), pp.350-355.
- 790 Sih, A., Bell, A.M. and Kerby, J.L., 2004. Two stressors are far deadlier than one. *Trends in Ecology*  
791 *& Evolution*, 19(6), pp.274-276.

- 792 Strain, E.M., Thomson, R.J., Micheli, F., Mancuso, F.P. and Airoidi, L., 2014. Identifying the  
793 interacting roles of stressors in driving the global loss of canopy-forming to mat-forming algae in  
794 marine ecosystems. *Global Change Biology*, 20(11), pp.3300-3312.
- 795 Thompson, P.L., MacLennan, M.M. and Vinebrooke, R.D., 2018a. Species interactions cause non-  
796 additive effects of multiple environmental stressors on communities. *Ecosphere*, 9(11), p.e02518.
- 797 Thompson, P.L., MacLennan, M.M. and Vinebrooke, R.D., 2018b. An improved null model for  
798 assessing the net effects of multiple stressors on communities. *Global Change Biology*, 24(1),  
799 pp.517-525.
- 800 Tittensor, D.P., Walpole, M., Hill, S.L., Boyce, D.G., Britten, G.L., Burgess, N.D., Butchart, S.H.,  
801 Leadley, P.W., Regan, E.C., Alkemade, R. and Baumung, R., 2014. A mid-term analysis of progress  
802 toward international biodiversity targets. *Science*, 346(6206), pp.241-244.
- 803 Todgham, A.E. and Stillman, J.H., 2013. Physiological responses to shifts in multiple environmental  
804 stressors: relevance in a changing world. *Integrative and Comparative Biology*, 53(4), pp.539-544.
- 805 Travers-Trolet, M., Shin, Y.J., Shannon, L.J., Moloney, C.L. and Field, J.G., 2014. Combined fishing  
806 and climate forcing in the southern Benguela upwelling ecosystem: an end-to-end modelling  
807 approach reveals dampened effects. *PLoS One*, 9(4), p.e94286.
- 808 Velasco, J., Gutiérrez-Cánovas, C., Botella-Cruz, M., Sánchez-Fernández, D., Arribas, P., Carbonell,  
809 J.A., Millán, A. and Pallarés, S., 2018. Effects of salinity changes on aquatic organisms in a multiple  
810 stressor context. *Philosophical Transactions of the Royal Society B*, 374(1764), p.20180011.
- 811 Vetter, D., Ruecker, G. and Storch, I., 2013. Meta-analysis: A need for well-defined usage in  
812 ecology and conservation biology. *Ecosphere*, 4(6), pp.1-24.
- 813 Viechtbauer, W. (2010). Conducting meta-analyses in R with the metafor package. *Journal of*  
814 *Statistical Software*, 36(3), 1-48. URL: <<http://www.jstatsoft.org/v36/i03/>>

815 Vörösmarty, C.J., McIntyre, P.B., Gessner, M.O., Dudgeon, D., Prusevich, A., Green, P., Glidden, S.,  
816 Bunn, S.E., Sullivan, C.A., Liermann, C.R. and Davies, P.M., 2010. Global threats to human water  
817 security and river biodiversity. *Nature*, 467(7315), pp.555-561.

818 Wolfram Research, Inc., 2016. Mathematica, (Version 10.4). *Wolfram Research, Inc., Champaign,*  
819 *Illinois.*

820 Woodward, G., Perkins, D.M. and Brown, L.E., 2010. Climate change and freshwater ecosystems:  
821 impacts across multiple levels of organization. *Philosophical Transactions of the Royal Society B:*  
822 *Biological Sciences*, 365(1549), pp.2093-2106.

823 Wu, Z., Dijkstra, P., Koch, G.W., Peñuelas, J. and Hungate, B.A., 2011. Responses of terrestrial  
824 ecosystems to temperature and precipitation change: A meta-analysis of experimental  
825 manipulation. *Global Change Biology*, 17(2), pp.927-942.
